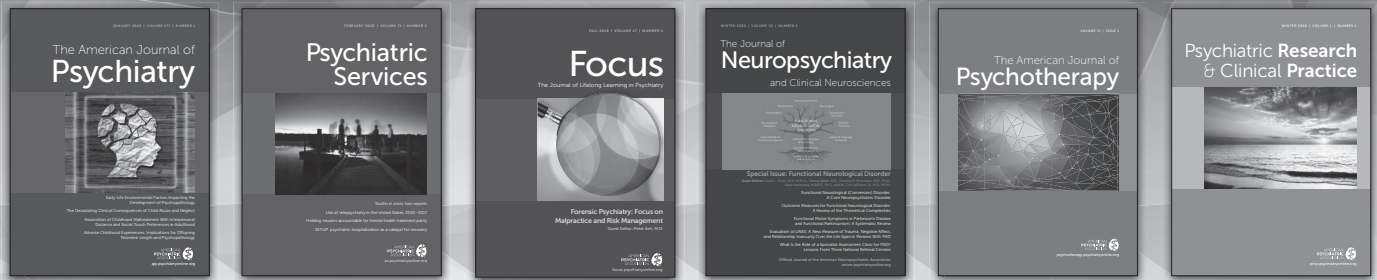

## More Ways to Engage Beyond Reading a Page

The journals of American Psychiatric Association Publishing are leading contributors to the literature. Our articles advance understanding of all aspects of mental and behavioral disorders and their treatment. With close to 10 million page views of journal content annually, APA Publishing's journals reach audiences at more than 2,000 U.S. and international institutions, a figure that includes nearly 100% of U.S. medical schools and hospitals.

APA Publishing is committed to discovery of journal articles and offers several ways to access journal content on the **PsychiatryOnline** knowledge portal, ensuring that practitioners can keep up with the latest findings in the manner they prefer.

### PODCASTS

Each episode brings you an in-depth look at articles featured in that month's issue. Lively discussion and wide-ranging interviews with authors cover the background, rationale, main findings, and future implications of the research.

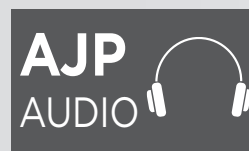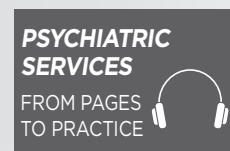

### AUDIO SYNOPSES

Prepared in collaboration with *Psychiatric News*, these audio synopses accompany the online article and can be accessed as a skill through Amazon's Alexa app.

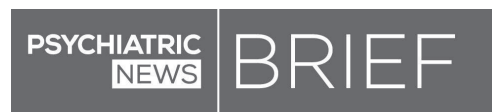

### CURATED COLLECTIONS

These collections of recent and seminal research in a given area can be used as a launch point for authors conducting literature reviews and for educators working on course content. Curated **Editor's Choice** collections from *Psychiatric Services* are currently available.

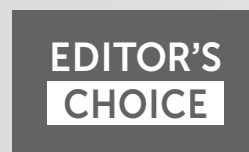

### ALERTS

Keep up with all of the latest research being published by signing up to receive **Publication Alerts** and following on Twitter @APAPubJournals.

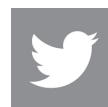

### GET INVOLVED!

We also encourage active contributions to our journals. Submit your research for publication consideration at one of our peer-reviewed titles. Even if you don't have a paper at present, visit our submission site and set up your reviewer account so that you have a say in future contributions to the literature.

[psychiatryonline.org/journals](http://psychiatryonline.org/journals)

Subscribe @ [www.appi.org](http://www.appi.org) • Email: [appi@psych.org](mailto:appi@psych.org) • Toll Free: 1-800-368-5777

AMERICAN  
PSYCHIATRIC  
ASSOCIATION  
PUBLISHING 

# Titles to Help Mental Health Professionals

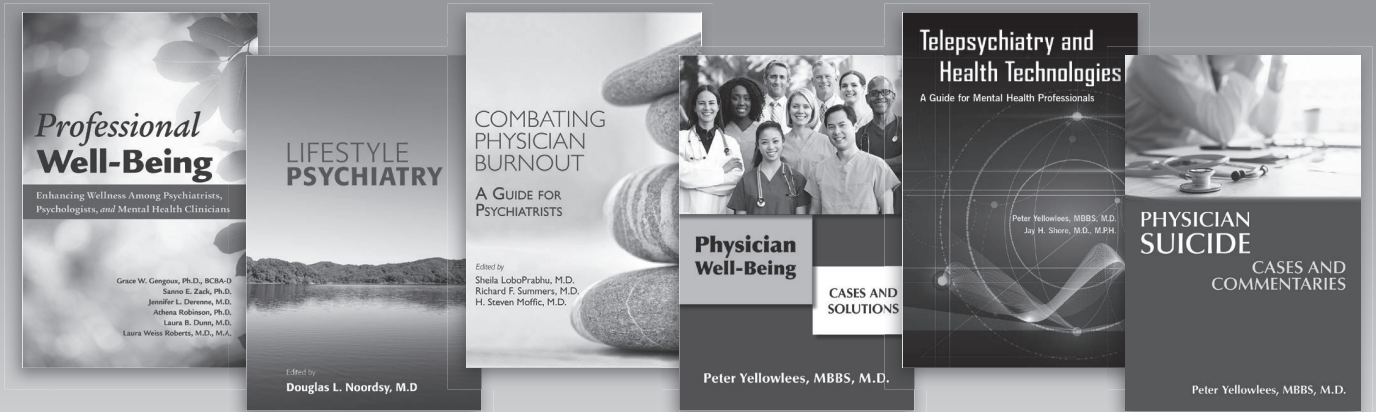

## Professional Well-Being

Enhancing Wellness Among Psychiatrists, Psychologists, and Mental Health Clinicians

Grace Gengoux, Ph.D., BCBA-D,  
Sanno E. Zack, Ph.D.,  
Jennifer L. Derenne, M.D.,  
Athena Robinson, Ph.D.,  
Laura B. Dunn, M.D., and  
Laura Weiss Roberts, M.D., M.A.

Physician self-care is correlated with patient care; a growing body of evidence supports this. Yet, a culture persists within medicine that values overwork, perfectionism, and self-sacrifice, often to the detriment of clinicians themselves. This book advocates for a new culture—one that is supportive of the health and well-being of health professionals to the benefit of the patients and populations they serve.

2020 • 298 pages • ISBN 978-1-61537-229-4  
Paperback • \$55.00 • Item #37229

2020 • 298 pages • ISBN 978-1-61537-308-6  
eBook • \$44.00 • Item #37308

## Lifestyle Psychiatry

Edited by Douglas L. Noordsy, M.D.

The book discusses the impact of the provider's lifestyle on clinical behavior and the implications of lifestyle medicine and psychiatry for health care systems and population health, offering a broader examination of the important role this new field can play in leading a sophisticated, holistic approach to optimizing wellness.

2019 • 416 pages • ISBN 978-1-61537-166-2  
Paperback • \$59.00 • Item #37166

2019 • 416 pages • ISBN 978-1-61537-252-2  
eBook • \$47.00 • Item #37252

## Combating Physician Burnout

A Guide for Psychiatrists

Edited by Sheila LoboPrabhu, M.D.,  
Richard F. Summers, M.D., and  
H. Steven Moffic, M.D.

This book aims to educate psychiatrists about three key concepts: stress, burnout, and physician impairment. The introduction discusses the history and social context of burnout. Subsequent sections discuss the potential effects of burnout on clinical care, contextual elements that may contribute to burnout, potential systemic and individual interventions, and the moral challenge burnout poses to psychiatry.

2020 • 344 pages • ISBN 978-1-61537-227-0  
Paperback • \$60.00 • Item #37227

2020 • 344 pages • ISBN 978-1-61537-272-0  
eBook • \$48.00 • Item #37272

## Physician Well-Being

Cases and Solutions

Peter Yellowlees, MBBS, M.D.

This book focuses its gaze on the range of the provider experience, from pre-med programs to specific scenarios such as medical marriages. Through fictional case studies, it proposes solutions designed to make today's typical health care environments more effective.

2020 • 265 pages • ISBN 978-1-61537-240-9  
Paperback • \$55.00 • Item #37240

2020 • 265 pages • ISBN 978-1-61537-290-4  
eBook • \$44.00 • Item #37290

## Telepsychiatry and Health Technologies

A Guide for Mental Health Professionals

Peter Yellowlees, MBBS, M.D.  
Jay H. Shore, M.D., M.P.H.

## Telepsychiatry and Health Technologies

A Guide for Mental Health Professionals

Peter Yellowlees, MBBS, M.D., and  
Jay H. Shore, M.D., M.P.H.

This a practical guide for mental health professionals seeking innovative digital technologies to improve the quality of care for patients with psychiatric disorders. Beginning with an overview of current psychiatric practice, the authors cover the broader context of telepsychiatry, give specific guidance on setting up and managing a telepsychiatry practice; and discuss in-person, online, and hybrid models of care, as well as data collection, electronic records, clinical documentation, and ethics.

2018 • 403 pages • ISBN 978-1-61537-085-6  
Paperback • \$69.00 • Item #37085

2018 • 403 pages • ISBN 978-1-61537-160-0  
eBook • \$55.00 • Item #37160

## Physician Suicide

Cases and Commentaries

Peter Yellowlees, MBBS, M.D.

The book examines how the related disorders of burnout, anxiety, depression, and addiction, can lead to suicide and explores the influence of gender, culture, aging, and personal resilience on outcomes. In addition, it investigates ways to mitigate the impact of these factors to improve physician health and well-being and thereby reduce the number of physicians who kill themselves.

2019 • 251 pages • ISBN 978-1-61537-169-3  
Paperback • \$52.00 • Item #37169

2019 • 251 pages • ISBN 978-1-61537-213-3  
eBook • \$41.95 • Item #37213

# NEW FALL TITLES in PSYCHIATRY

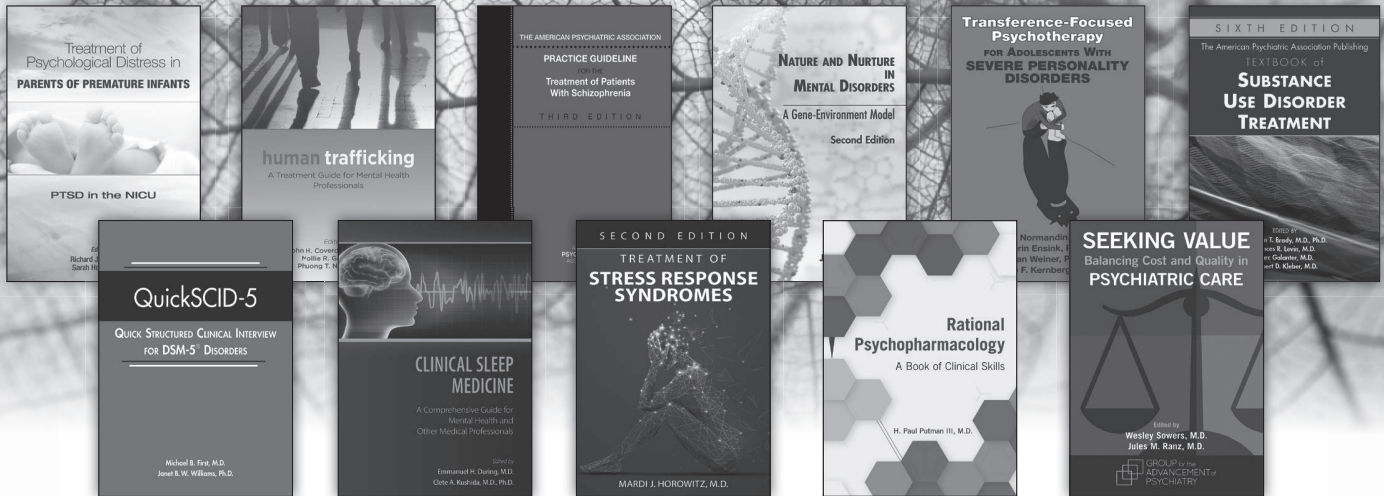

## Treatment of Psychological Distress in Parents of Premature Infants PTSD in the NICU

Edited by Richard J. Shaw, M.D., and Sarah Horwitz, Ph.D.

2021 • 368 pages • ISBN 978-1-61537-320-8  
Paperback • \$58.00 • Item #37320  
2021 • 368 pages • ISBN 978-1-61537-365-9  
eBook • \$46.50 • Item #37365

## Quick Structured Clinical Interview for DSM-5® Disorders (QuickSCID-5)

First, Michael B., M.D., and Janet B. W. Williams, Ph.D.

2021 • 58 pages • ISBN 978-1-61537-363-5  
Paperback • \$77.00 • Item #37363  
2021 • 58 pages • ISBN 978-1-61537-364-2  
eBook • \$62.00 • Item #37364

## Human Trafficking

A Treatment Guide for Mental Health Professionals

Edited by John H. Coverdale, M.D., Mollie R. Gordon, M.D., and Phuong T. Nguyen, Ph.D.

2021 • 284 pages • ISBN 978-1-61537-248-5  
Paperback • \$48.00 • Item #37248  
2021 • 284 pages • ISBN 978-1-61537-315-4  
eBook • \$38.00 • Item #37315

## Clinical Sleep Medicine

A Comprehensive Guide for Mental Health and Other Medical Professionals

Edited by Emmanuel H. During, M.D., and Clete A. Kushida, M.D., Ph.D.

2021 • 420 pages • ISBN 978-1-61537-300-0  
Paperback • \$67.00 • Item #37300  
2021 • 420 pages • ISBN 978-1-61537-316-1  
eBook • \$54.00 • Item #37316

## The American Psychiatric Association Practice Guideline for the Treatment of Patients with Schizophrenia, Third Edition

American Psychiatric Association

2021 • 336 pages • ISBN 978-0-89042-469-8  
Paperback • \$78.00 • Item #2469  
2021 • 336 pages • ISBN 978-0-89042-474-2  
eBook • \$62.00 • Item #2474

## Treatment of Stress Response Syndromes, Second Edition

Mardi J. Horowitz, M.D.

2021 • 108 pages • ISBN 978-1-61537-305-5  
Paperback • \$35.00 • Item #37305  
2021 • 108 pages • ISBN 978-1-61537-367-3  
eBook • \$28.00 • Item #37367

## Nature and Nurture in Mental Disorders

A Gene-Environment Model, Second Edition

Joel Paris, M.D.

2021 • 204 pages • ISBN 978-1-61537-334-5  
Paperback • \$57.00 • Item #37334  
2021 • 204 pages • ISBN 978-1-61537-368-0  
eBook • \$45.95 • Item #37368

## Rational Psychopharmacology

A Book of Clinical Skills

H. Paul Putman III, M.D., DLFAPA  
2020 • 334 pages • ISBN 978-1-61537-313-0  
Paperback • \$59.00 • Item #37313  
2020 • 334 pages • ISBN 978-1-61537-317-8  
eBook • \$47.20 • Item #37317

Coming November 2020!

## Transference-Focused Psychotherapy for Adolescents With Severe Personality Disorders

Lina Normandin, Ph.D., Karin Ensink, Ph.D., Alan Weiner, Ph.D., and Otto F. Kernberg, M.D.

2021 • 304 pages • ISBN 978-1-61537-314-7  
Paperback • \$58.00 • Item #37314  
2021 • 304 pages • ISBN 978-1-61537-354-3  
eBook • \$46.00 • Item #37354

Coming November 2020!

## Seeking Value

Balancing Cost and Quality in Psychiatric Care

Edited by Wesley Sowers, M.D., and Jules M. Ranz, M.D.

Group for the Advancement of Psychiatry  
2021 • 704 pages • ISBN 978-0-87318-225-6  
Paperback • \$85.00 • Item #7225  
2021 • 704 pages • ISBN 978-0-87318-226-3  
eBook • \$68.00 • Item #7226

Coming December 2020!

## The American Psychiatric Association Publishing Textbook of Substance Abuse Treatment, Sixth Edition

Edited by Kathleen T. Brady, M.D., Ph.D., Frances R. Levin, M.D., Marc Galanter, M.D., and Herbert D. Kleber, M.D.

2021 • 960 pages • ISBN 978-1-61537-221-8  
Hardcover • Special Prepublication Price of \$183.00 until January 31, 2021 (thereafter \$215.00) Item #37221  
2021 • 960 pages • ISBN 978-1-61537-353-6  
eBook • \$175.00 • Item #37353

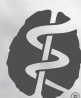



Searching for  
the perfect  
psychiatric  
career?

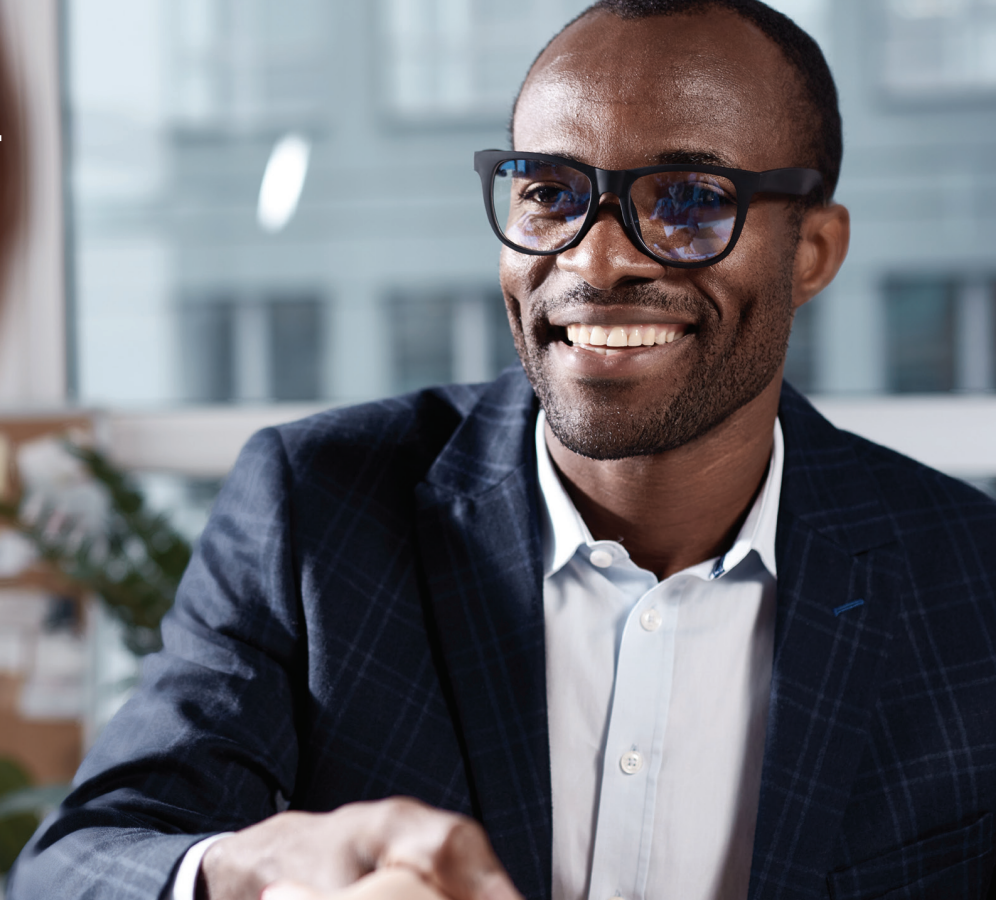

## Let APA JobCentral help!

### Manage Your Career

- Browse hundreds of active job listings!
- Create an account to save jobs, store multiple resumes and cover letters and communicate with employers through our internal messaging system.
- Set up multiple job alerts specifying your skills, interests and location to receive e-mails when employers post jobs that match your criteria.

### Recruit for Open Positions

- Post your job in front of thousands of highly qualified psychiatrists.
- Cross promote your job listing in Psychiatric News.
- Search the anonymous resume database to find your ideal candidate.

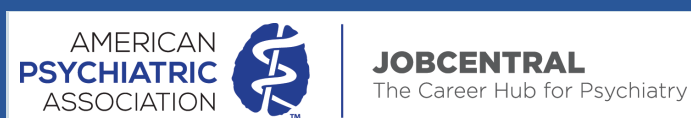

[jobs.psychiatry.org](https://jobs.psychiatry.org)



# See and Hear What the Field Is Discussing!

*Psychiatric Services* features research related to the delivery of mental health services, especially for people with serious mental illness in community-based treatment programs. Provision of high-quality care involves collaboration among a variety of professionals. Clinicians, administrators, and policy makers look to *Psychiatric Services* for research on how to deliver evidence-based treatments, to take an integrated “whole-health” approach to care, and to better engage individuals in their care. Mental health’s current focus on patient-centered, recovery-oriented care and on dissemination of evidence-based practices is transforming service delivery systems at all levels. Research published in *Psychiatric Services* contributes to this transformation.

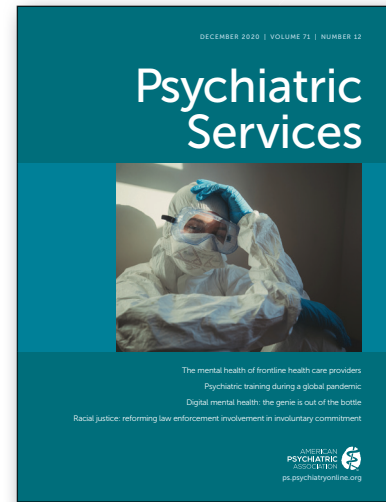

## Our Most Talked About Articles in 2020:

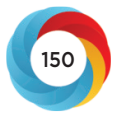

### Augmenting Evidence-Based Care With a Texting Mobile Interventionist: A Pilot Randomized Controlled Trial

December 2020 issue

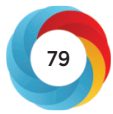

### Cost-Effectiveness of Esketamine Nasal Spray for Patients With Treatment-Resistant Depression in the United States

October 2020 issue

## The Discussion Continues: *Psychiatric Services*' Podcast “From Pages to Practice”

Editor Lisa Dixon, M.D., M.P.H., and Podcast Editor and co-host Josh Berezin, M.D., M.S., discuss the latest mental health services research published in *Psychiatric Services* and why it is relevant. Topics include community-based treatment programs, collaborative care, evidence-based treatment and service delivery, criminal and social justice, policy analysis, and more.

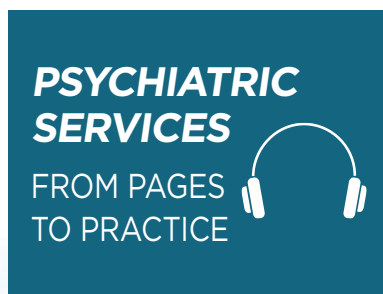

### October 2020: Smartphone Apps for College Mental Health

John Torous, M.D., M.B.I., joins Dr. Dixon and Dr. Berezin to discuss the expanded access to smartphone apps for mental health on college campuses as well as issues regarding the privacy, efficacy, and quality of mental health apps.

### November 2020: Improving Mental Health Crisis Systems

Michael F. Hogan, Ph.D., discusses the challenges and opportunities for nationwide reform in systems of care for individuals in psychiatric crisis in the United States.
