JANUARY 2021 | VOLUME 72 | NUMBER 1

# Psychiatric Services

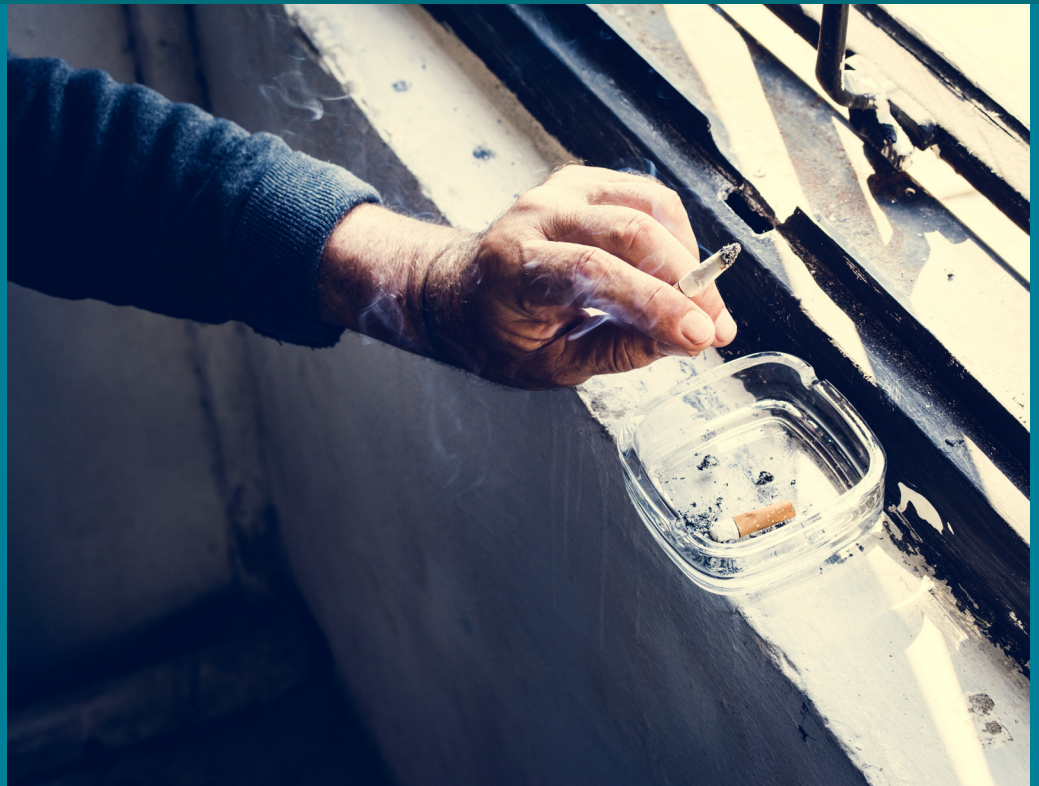

Viewpoint: The allure of conspiracy theories

The promise of varenicline for smokers with schizophrenia

Examining national incidence of involuntary psychiatric detentions

Telehealth beyond COVID-19

AMERICAN  
**PSYCHIATRIC**  
ASSOCIATION

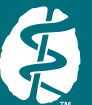

[ps.psychiatryonline.org](http://ps.psychiatryonline.org)
