# Dive Deeper With *Psychiatric Services*' Topic Collections

Editor Lisa Dixon and the journal's Early Career Psychiatrist Advisory Committee offer **Editor's Choice** curated collections from the rich resource of articles published in *Psychiatric Services*. Updates focus on one area, summarizing for the researcher, clinician, and policy analyst the latest information and seminal research with links to specific content.

**EDITOR'S  
CHOICE**

Available at the journal's website are the following article collections:

- Community-Based Mental Health Crisis Services
- Early Psychosis Intervention
- Family Members and Caregivers
- Health Disparities Among People With Serious Mental Illness
- Homelessness and Mental Health
- Integrated Care
- Mental Health Criminal Justice Diversion
- Mental Health Disparities by Race and Ethnicity of Adults
- Mental Health Services in Rural Areas
- Peer Support
- Perinatal Psychiatry
- Recovery
- Resilience
- Substance Use Disorders
- Suicide Prevention
- Telepsychiatry Service Implementation in the Era of COVID-19
- Violence and Mental Illness

Sign up for Editor's Choice alert at <http://appi.org/etocs>.

Visit [ps.psychiatryonline.org/editorschoice](http://ps.psychiatryonline.org/editorschoice)

AMERICAN  
PSYCHIATRIC  
ASSOCIATION  
PUBLISHING

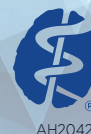

AH2042

## The American Journal of Psychotherapy

APA's journal of psychotherapy practice and research

Since 1947, the *American Journal of Psychotherapy* has provided a forum for advancing the theory, science, and clinical practice of psychotherapy, publishing articles that expand understanding of psychotherapies, especially in the domains of efficacy, process, education, and practice. The journal provides authors and readers the opportunity to engage fully in pressing psychotherapy issues such as defining core elements of psychotherapies, dissemination of evidence-based practices, scaling best practices for expansion to larger populations, understanding mechanisms of change, and evaluating best practices for psychotherapy training and supervision. From its new home as part of APA Publishing's portfolio of journals, the *American Journal of Psychotherapy* is the ideal vehicle to disseminate knowledge about psychotherapy and send a message that psychotherapy remains firmly within the purview of psychiatry.

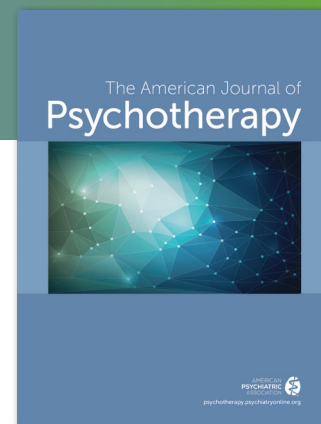

Holly A. Swartz, M.D., Editor-in-Chief

Frequency: Quarterly  
Online ISSN: 2575-6559  
[psychotherapy.psychiatryonline.org](http://psychotherapy.psychiatryonline.org)

➤ To receive updates on new content, follow the journal on  Twitter (@APAPubJournals) and sign up for free publication alerts at [psychiatryonline.org](http://psychiatryonline.org)

➤ To see more from the journal, including its entire 70+-year archive or to get information about submitting a paper, visit [www.psychotherapy.psychiatryonline.org](http://www.psychotherapy.psychiatryonline.org)

AMERICAN  
PSYCHIATRIC  
ASSOCIATION  
PUBLISHING



appi.org  
1-800-368-5777  
appi@psych.org

Subscribe Now! Visit [appi.org](http://appi.org) for pricing and more information!

[psychotherapy.psychiatryonline.org](http://psychotherapy.psychiatryonline.org)

AH2041A
